# Supplementary material
Source: bioRxiv or medRxiv preprint supplement (http://medrxiv.stage.highwire.org/highwire/filestream/91892/field_highwire_adjunct_files/6/2020.07.31.20165654-2.pdf)
Supplement: Supplementary file [file 2020.07.31.20165654-2.pdf]

**Supplemental Table 2.** Restrictions on mass gatherings put in place in the 30 most populous counties in the United States.

| Geographic Area Name (County Name)                         | Case Rate <sup>1</sup><br>(per 10,000) | Start Date<br>(2020)   | Duration<br>until May<br>10th | Days<br>late <sup>2</sup> | Cases at<br>Start <sup>3</sup> | Case<br>Rate at<br>Start <sup>4</sup> |
|------------------------------------------------------------|----------------------------------------|------------------------|-------------------------------|---------------------------|--------------------------------|---------------------------------------|
| <i>Counties with High Case Rates (High)<sup>5</sup></i>    |                                        |                        |                               |                           |                                |                                       |
| Bronx County, New York                                     | March 13 <sup>th</sup>                 | March 12 <sup>th</sup> | 59                            | -1                        | 38                             | 0.3                                   |
| Nassau County, New York                                    | March 17 <sup>th</sup>                 | March 12 <sup>th</sup> | 59                            | -5                        | 28                             | 0.2                                   |
| Queens County, New York                                    | March 13 <sup>th</sup>                 | March 12 <sup>th</sup> | 59                            | -1                        | 86                             | 0.4                                   |
| Suffolk County, New York                                   | March 19 <sup>th</sup>                 | March 12 <sup>th</sup> | 59                            | -7                        | 6                              | 0.0                                   |
| Kings County, New York                                     | March 13 <sup>th</sup>                 | March 12 <sup>th</sup> | 59                            | -1                        | 70                             | 0.3                                   |
| New York County, New York                                  | March 12 <sup>th</sup>                 | March 12 <sup>th</sup> | 59                            | 0                         | 123                            | 0.8                                   |
| Philadelphia County, Pennsylvania                          | March 23 <sup>rd</sup>                 | March 30 <sup>th</sup> | 42                            | 7                         | 890                            | 5.6                                   |
| Middlesex County, Massachusetts                            | March 21 <sup>st</sup>                 | March 13 <sup>th</sup> | 58                            | -8                        | 49                             | 0.3                                   |
| Wayne County, Michigan                                     | March 22 <sup>nd</sup>                 | March 13 <sup>th</sup> | 58                            | -9                        | 1                              | 0.0                                   |
| Cook County, Illinois                                      | March 21 <sup>st</sup>                 | March 13 <sup>th</sup> | 58                            | -8                        | 27                             | 0.1                                   |
| <i>Counties with Moderate Case Rates (Mid)<sup>6</sup></i> |                                        |                        |                               |                           |                                |                                       |
| Miami-Dade County, Florida                                 | March 23 <sup>rd</sup>                 | April 3 <sup>rd</sup>  | 37                            | 11                        | 2886                           | 10.6                                  |
| King County, Washington                                    | March 12 <sup>th</sup>                 | March 13 <sup>th</sup> | 58                            | 1                         | 270                            | 1.2                                   |
| Los Angeles County, California                             | March 26 <sup>th</sup>                 | March 11 <sup>th</sup> | 60                            | -15                       | 20                             | 0.0                                   |
| Broward County, Florida                                    | March 22 <sup>nd</sup>                 | April 3 <sup>rd</sup>  | 37                            | 12                        | 1481                           | 7.8                                   |
| Palm Beach County, Florida                                 | March 26 <sup>th</sup>                 | April 3 <sup>rd</sup>  | 37                            | 8                         | 737                            | 5.1                                   |
| Dallas County, Texas                                       | March 25 <sup>th</sup>                 | March 21 <sup>st</sup> | 50                            | -4                        | 74                             | 0.3                                   |
| Clark County, Nevada                                       | March 24 <sup>th</sup>                 | March 24 <sup>th</sup> | 47                            | 0                         | 126                            | 0.6                                   |
| Riverside County, California                               | March 30 <sup>th</sup>                 | March 11 <sup>th</sup> | 60                            | -19                       | 4                              | 0.0                                   |
| Harris County, Texas                                       | March 28 <sup>th</sup>                 | March 21 <sup>st</sup> | 50                            | -7                        | 55                             | 0.1                                   |
| Tarrant County, Texas                                      | March 30 <sup>th</sup>                 | March 21 <sup>st</sup> | 50                            | -9                        | 29                             | 0.1                                   |

| Geographic Area Name (County Name)                    | Case Rate <sup>1</sup><br>(per 10,000) | Start Date<br>(2020)   | Duration<br>until May<br>10th | Days<br>late <sup>2</sup> | Cases at<br>Start <sup>3</sup> | Case<br>Rate at<br>Start <sup>4</sup> |
|-------------------------------------------------------|----------------------------------------|------------------------|-------------------------------|---------------------------|--------------------------------|---------------------------------------|
| <i>Counties with Low Case Rates (Low)<sup>7</sup></i> |                                        |                        |                               |                           |                                |                                       |
| San Diego County, California                          | March 27 <sup>th</sup>                 | March 11 <sup>th</sup> | 60                            | -16                       | 3                              | 0.0                                   |
| Maricopa County, Arizona                              | March 28 <sup>th</sup>                 | March 11 <sup>th</sup> | 40                            | 3                         | 690                            | 1.6                                   |
| San Bernardino County, California                     | April 2 <sup>nd</sup>                  | March 11 <sup>th</sup> | 60                            | -22                       | 0                              | 0.0                                   |
| Alameda County, California                            | March 26 <sup>th</sup>                 | March 11 <sup>th</sup> | 60                            | -15                       | 3                              | 0.0                                   |
| Santa Clara County, California                        | March 19 <sup>th</sup>                 | March 11 <sup>th</sup> | 60                            | -8                        | 43                             | 0.2                                   |
| Orange County, Florida                                | March 27 <sup>th</sup>                 | April 3 <sup>rd</sup>  | 37                            | 7                         | 541                            | 4.1                                   |
| Orange County, California                             | March 27 <sup>th</sup>                 | March 11 <sup>th</sup> | 60                            | -16                       | 5                              | 0.0                                   |
| Hillsborough County, Florida                          | March 26 <sup>th</sup>                 | April 3 <sup>rd</sup>  | 37                            | 8                         | 404                            | 2.9                                   |
| Bexar County, Texas                                   | April 1 <sup>st</sup>                  | March 21 <sup>st</sup> | 50                            | -11                       | 29                             | 0.2                                   |
| Sacramento County, California                         | March 26 <sup>th</sup>                 | March 11 <sup>th</sup> | 60                            | -15                       | 10                             | 0.1                                   |

<sup>1</sup> The date in which the cumulative number of cases per 10,000 of the respective county population was  $\geq 1.0$ .

<sup>2</sup> The number of days after the intervention was implemented after the case rate was  $\geq 1.0$ . Negative values indicate an intervention that was implemented before the case rate was  $\geq 1.0$ .

<sup>3</sup> The cumulative number of cases when the intervention was implemented.

<sup>4</sup> The cumulative number of cases per 10,000 of the respective county population when the intervention was implemented.

<sup>5</sup> High – a case rate of  $> 100$  per 10,000.

<sup>6</sup> Mid – a case rate of 15 to 100 per 10,000.

<sup>7</sup> Low – a case rate of  $< 15$  per 10,000.
